# Supplementary material for: White matter tract signatures of the progressive aphasias
Source: PubMed Central journal article supplement (PMC3601331; doi:10.1016/j.neurobiolaging.2012.12.002), 2013-06
Supplement: mmc1.pdf [file mmc1.pdf]

### Supplementary Table 1.

White matter tract changes in PPA groups compared to AD group: quantitative data

| White Matter changes in sv-PPA vs. AD |         |         |      |                              |         |        |       |                             |         |        |       |
|---------------------------------------|---------|---------|------|------------------------------|---------|--------|-------|-----------------------------|---------|--------|-------|
| Axial Diffusivity (sv > AD)           |         |         |      | Radial Diffusivity (sv > AD) |         |        |       | Trace Diffusivity (sv > AD) |         |        |       |
| Tract                                 | p-value | voxels  | %    | Tract                        | p-value | voxels | %     | Tract                       | p-value | voxels | %     |
| L UF                                  | 0.003   | 132     | 4.73 | L ILF                        | 0.01    | 512    | 5.39  | L ILF                       | 0.01    | 463    | 4.88  |
| L ILF                                 | 0.007   | 393     | 4.14 | L UF                         | 0.012   | 385    | 13.80 | L UF                        | 0.02    | 298    | 10.68 |
| R UF                                  | 0.011   | 90      | 5.20 | R ILF                        | 0.015   | 236    | 3.53  | R ILF                       | 0.02    | 214    | 3.2   |
| CC                                    | 0.015   | 18      | 0.02 | R UF                         | 0.019   | 207    | 11.96 | R UF                        | 0.02    | 162    | 9.36  |
| R ILF                                 | 0.018   | 213     | 3.19 | CC                           | 0.035   | 12     | 0.01  | CC                          | 0.02    | 7      | 0.01  |
| White Matter changes in AD vs. nv-PPA |         |         |      |                              |         |        |       |                             |         |        |       |
| Axial Diffusivity (AD > nv)           |         |         |      |                              |         |        |       |                             |         |        |       |
| Tract                                 |         | p-value |      | voxels                       |         | %      |       |                             |         |        |       |
| CC                                    |         | 0.039   |      | 1244                         |         | 1.37   |       |                             |         |        |       |
| Fornix                                |         | 0.039   |      | 2                            |         | 0.02   |       |                             |         |        |       |
| R ILF                                 |         | 0.045   |      | 216                          |         | 3.23   |       |                             |         |        |       |
| R SLF                                 |         | 0.047   |      | 36                           |         | 0.32   |       |                             |         |        |       |
