# Supplementary material for: White matter tract signatures of the progressive aphasias
Source: PubMed Central journal article supplement (PMC3601331; doi:10.1016/j.neurobiolaging.2012.12.002), 2013-06
Supplement: mmc2.pdf [file mmc2.pdf]

**Supplementary Table 2.** White matter tract comparisons between PPA groups: quantitative data

|                    | sv-PPA > nv-PPA |              |            |            | sv-PPA > lv-PPA |              |            |            | lv-PPA > sv-PPA |      |        |       | lv-PPA > nv-PPA |      |        |       |
|--------------------|-----------------|--------------|------------|------------|-----------------|--------------|------------|------------|-----------------|------|--------|-------|-----------------|------|--------|-------|
|                    | Tract           | p-           | voxels     | %          | Tract           | p-           | voxels     | %          | Tract           | p-   | voxels | %     | Tract           | p-   | voxels | %     |
| Axial Diffusivity  | L UF            | <b>0.004</b> | <b>129</b> | <b>4.6</b> | L UF            | <b>0.009</b> | <b>125</b> | <b>4.5</b> | CC              | 0.03 | 1496   | 1.6   | R ILF           | 0.01 | 998    | 14.9  |
|                    | L ILF           | 0.012        | 622        | 6.6        | L ILF           | 0.01         | 190        | 2.0        | L CST           | 0.05 | 25     | 0.3   | L ILF           | 0.01 | 1565   | 16.5  |
|                    | R ILF           | 0.023        | 303        | 4.5        |                 |              |            |            |                 |      |        |       | CC              | 0.02 | 4427   | 4.9   |
|                    | R UF            | 0.024        | 67         | 3.9        |                 |              |            |            |                 |      |        |       | L SLF           | 0.02 | 817    | 5.9   |
|                    | CC              | 0.025        | 102        | 0.1        |                 |              |            |            |                 |      |        |       | R CST           | 0.02 | 437    | 6.5   |
|                    |                 |              |            |            |                 |              |            |            |                 |      |        |       | R ATR           | 0.02 | 63     | 0.6   |
|                    |                 |              |            |            |                 |              |            |            |                 |      |        |       | R SLF           | 0.02 | 848    | 7.6   |
|                    |                 |              |            |            |                 |              |            |            |                 |      |        |       | L CB            | 0.02 | 66     | 2.2   |
|                    |                 |              |            |            |                 |              |            |            |                 |      |        |       | L ATR           | 0.02 | 31     | 0.3   |
|                    |                 |              |            |            |                 |              |            |            |                 |      |        |       | L CST           | 0.02 | 271    | 3.7   |
|                    |                 |              |            |            |                 |              |            |            |                 |      |        | R UF  | 0.04            | 42   | 2.4    |       |
| Radial Diffusivity | L UF            | 0.011        | 314        | 11.3       | L UF            | 0.02         | 271        | 9.7        |                 |      |        |       | L ILF           | 0.02 | 1262   | 13.3  |
|                    | L ILF           | 0.015        | 516        | 5.4        | L ILF           | 0.02         | 278        | 2.9        |                 |      |        |       | L SLF           | 0.03 | 381    | 2.8   |
|                    | R ILF           | 0.019        | 309        | 4.6        |                 |              |            |            |                 |      |        |       | CC              | 0.03 | 2601   | 2.9   |
|                    | R UF            | 0.020        | 109        | 6.3        |                 |              |            |            |                 |      |        |       | R CST           | 0.04 | 245    | 3.7   |
|                    | CC              | 0.030        | 6          | 0.0        |                 |              |            |            |                 |      |        |       | R ILF           | 0.04 | 794    | 11.9  |
|                    |                 |              |            |            |                 |              |            |            |                 |      |        |       | R ATR           | 0.04 | 30     | 0.3   |
|                    |                 |              |            |            |                 |              |            |            |                 |      |        | R SLF | 0.05            | 93   | 0.8    |       |
| Trace Diffusivity  | L UF            | 232          | 8.32       | 0.01       | L UF            | 0.01         | 144        | 5.16       |                 |      |        |       | L ILF           | 0.01 | 1636   | 17.23 |
|                    | L ILF           | 556          | 5.86       | 0.02       | L ILF           | 0.02         | 259        | 2.73       |                 |      |        |       | CC              | 0.01 | 4452   | 4.90  |
|                    | R ILF           | 280          | 4.19       | 0.02       |                 |              |            |            |                 |      |        |       | R ILF           | 0.01 | 1150   | 17.21 |
|                    | R UF            | 88           | 5.08       | 0.02       |                 |              |            |            |                 |      |        |       | L CB            | 0.01 | 170    | 5.59  |
|                    | CC              | 13           | 0.01       | 0.02       |                 |              |            |            |                 |      |        |       | L SLF           | 0.01 | 813    | 5.89  |
|                    |                 |              |            |            |                 |              |            |            |                 |      |        |       | R SLF           | 0.02 | 372    | 3.35  |
|                    |                 |              |            |            |                 |              |            |            |                 |      |        |       | R UF            | 0.02 | 29     | 1.68  |
|                    |                 |              |            |            |                 |              |            |            |                 |      |        |       | Fornix          | 0.02 | 5      | 0.05  |
|                    |                 |              |            |            |                 |              |            |            |                 |      |        |       | R CST           | 0.03 | 490    | 7.30  |
|                    |                 |              |            |            |                 |              |            |            |                 |      |        |       | L UF            | 0.03 | 30     | 1.08  |
|                    |                 |              |            |            |                 |              |            |            |                 |      |        |       | L CST           | 0.03 | 262    | 3.57  |
|                    |                 |              |            |            |                 |              |            |            |                 |      |        |       | L ATR           | 0.04 | 45     | 0.39  |
|                    |                 |              |            |            |                 |              |            |            |                 |      |        |       | R ATR           | 0.04 | 126    | 1.23  |
| FA                 |                 |              |            |            |                 |              |            |            |                 |      |        |       | L ILF           | 0.04 | 85     | 0.9   |
|                    |                 |              |            |            |                 |              |            |            |                 |      |        |       | CC              | 0.05 | 170    | 0.2   |
|                    |                 |              |            |            |                 |              |            |            |                 |      |        |       | R CST           | 0.05 | 68     | 1.0   |
